# Supplementary material for: Derivation of Highly Predictive 3D-QSAR Models for hERG Channel Blockers Based on the Quantum Artificial Neural Network Algorithm
Source: MDPI journal article supplement (doi:10.3390/ph16111509), 2023-10-24
Supplement: s1 [file s1]

**Table S1.** PubChem CID, molecular weights, experimental pIC<sub>50</sub> values, and calculated pIC<sub>50</sub> values of all the molecules in training sets.

| PubChem CID | molecular weight | experimental<br>pIC <sub>50</sub> | calculated<br>pIC <sub>50</sub> |
|-------------|------------------|-----------------------------------|---------------------------------|
| 4893        | 383.41           | 4.62                              | 4.91237                         |
| 3386        | 309.33           | 4.91                              | 5.09472                         |
| 4212        | 444.49           | 5.45                              | 5.50886                         |
| 71329       | 441.56           | 8.39                              | 8.31802                         |
| 2913        | 287.40           | 4.77                              | 4.89394                         |
| 5775        | 281.36           | 4.70                              | 4.86911                         |
| 2160        | 277.41           | 4.75                              | 4.75281                         |
| 2267        | 381.90           | 7.00                              | 7.23697                         |
| 135398745   | 312.43           | 4.00                              | 4.05538                         |
| 3354        | 391.47           | 4.62                              | 4.69784                         |
| 3008902     | 512.69           | 6.26                              | 6.26207                         |
| 3008917     | 481.68           | 6.82                              | 6.82021                         |
| 56673962    | 555.76           | 6.28                              | 6.18281                         |
| 11619850    | 475.32           | 8.85                              | 8.75532                         |
| 11975438    | 380.42           | 7.70                              | 7.52088                         |
| 11539096    | 424.43           | 4.82                              | 5.03626                         |
| 91447871    | 417.52           | 5.28                              | 5.12188                         |
| 44417993    | 399.53           | 4.70                              | 5.08565                         |
| 11973802    | 437.47           | 4.32                              | 4.13728                         |
| 44417916    | 433.98           | 4.85                              | 4.80751                         |
| 44418482    | 339.48           | 3.99                              | 3.74217                         |

|          |        |      |         |
|----------|--------|------|---------|
| 44418490 | 295.47 | 4.17 | 4.536   |
| 44418472 | 273.38 | 4.71 | 4.76457 |
| 44418491 | 287.40 | 3.93 | 3.74562 |
| 16220879 | 481.61 | 5.47 | 5.51511 |
| 44421703 | 388.53 | 5.85 | 5.39072 |
| 16220959 | 466.60 | 5.76 | 5.35944 |
| 16220791 | 418.56 | 5.29 | 5.32834 |
| 44421702 | 509.62 | 5.27 | 5.00865 |
| 16220874 | 515.07 | 5.59 | 5.53416 |
| 15986136 | 457.52 | 4.40 | 4.37202 |
| 23631000 | 527.61 | 7.20 | 7.157   |
| 23631092 | 494.05 | 7.10 | 7.20988 |
| 44438747 | 485.49 | 5.50 | 5.43784 |
| 44438750 | 571.59 | 5.07 | 5.21841 |
| 44438753 | 570.61 | 5.20 | 5.21979 |
| 44438755 | 550.63 | 5.18 | 5.13304 |
| 11713742 | 552.62 | 5.04 | 5.03554 |
| 44438745 | 551.63 | 6.13 | 5.88978 |
| 44438740 | 499.56 | 4.19 | 4.35669 |
| 44447783 | 556.59 | 7.17 | 7.15002 |
| 11585034 | 577.54 | 5.60 | 5.53094 |
| 11656848 | 548.65 | 5.90 | 5.7591  |
| 11496746 | 484.62 | 4.30 | 4.3722  |
| 11562113 | 483.58 | 5.90 | 6.00979 |

|          |        |      |         |
|----------|--------|------|---------|
| 11669953 | 468.57 | 4.60 | 4.82717 |
| 44454278 | 454.55 | 7.20 | 7.31312 |
| 44454217 | 552.61 | 6.40 | 6.34725 |
| 44447775 | 558.58 | 7.35 | 7.38277 |
| 11554412 | 461.49 | 4.32 | 3.90378 |
| 11692376 | 540.73 | 5.80 | 6.12689 |
| 44454192 | 526.70 | 4.90 | 4.89665 |
| 11606456 | 554.75 | 5.40 | 5.43405 |
| 44454339 | 554.75 | 5.60 | 5.62133 |
| 44454340 | 526.70 | 4.40 | 4.32799 |
| 11712044 | 448.58 | 4.80 | 4.46972 |
| 44454248 | 577.54 | 5.60 | 5.52701 |
| 11519858 | 578.75 | 5.10 | 5.03803 |
| 11539722 | 452.57 | 5.20 | 5.08361 |
| 11527195 | 591.57 | 5.00 | 4.88313 |
| 85059382 | 335.40 | 4.56 | 4.54345 |
| 9883980  | 330.43 | 5.80 | 5.90079 |
| 44418471 | 299.42 | 4.55 | 4.54396 |
| 16220962 | 479.64 | 7.10 | 7.13597 |
| 11610716 | 385.51 | 5.06 | 5.14383 |
| 21973850 | 397.52 | 4.70 | 4.88984 |
| 44454275 | 563.51 | 5.20 | 5.16118 |
| 59050049 | 558.58 | 7.80 | 7.76412 |
| 85130389 | 558.56 | 6.07 | 6.06362 |

|          |        |      |         |
|----------|--------|------|---------|
| 44593444 | 296.19 | 5.67 | 5.766   |
| 9814248  | 279.74 | 5.28 | 5.32721 |
| 44562616 | 300.15 | 5.91 | 5.90663 |
| 44562612 | 282.16 | 5.68 | 5.64594 |
| 9966330  | 307.17 | 5.34 | 5.00868 |
| 44563244 | 296.19 | 5.97 | 5.73463 |
| 44562611 | 296.19 | 5.75 | 5.9612  |
| 44563165 | 310.22 | 5.57 | 5.59893 |
| 44562614 | 300.15 | 5.68 | 5.90354 |
| 44562613 | 279.74 | 5.52 | 5.52314 |
| 9966438  | 310.22 | 5.83 | 5.6715  |
| 9966437  | 310.22 | 5.47 | 5.96293 |
| 75054235 | 517.71 | 6.61 | 6.60028 |
| 44563239 | 275.77 | 5.43 | 5.40315 |
| 44563241 | 275.77 | 5.28 | 5.39376 |
| 44563243 | 282.16 | 5.32 | 5.35229 |
| 44563238 | 282.16 | 6.19 | 6.12628 |
| 44143435 | 441.57 | 5.52 | 5.36342 |
| 44143456 | 461.02 | 5.47 | 5.27622 |
| 74933242 | 399.89 | 4.54 | 4.42038 |
| 44562944 | 295.30 | 4.98 | 5.09018 |
| 72996478 | 322.45 | 5.52 | 5.51031 |
| 11516387 | 377.49 | 5.30 | 5.32046 |
| 11675333 | 381.45 | 5.00 | 5.19201 |

|          |        |      |         |
|----------|--------|------|---------|
| 75072777 | 411.49 | 5.92 | 5.7931  |
| 24901589 | 453.56 | 5.30 | 5.33267 |
| 10183035 | 460.51 | 4.87 | 4.82696 |
| 9919680  | 422.44 | 4.18 | 4.22559 |
| 74347291 | 405.36 | 6.03 | 5.82205 |
| 9944019  | 296.19 | 5.42 | 5.37285 |
| 74828503 | 574.49 | 5.92 | 5.71673 |
| 74828400 | 572.52 | 6.30 | 5.92905 |
| 57896619 | 586.55 | 7.40 | 7.48815 |
| 9947172  | 364.19 | 5.95 | 5.90156 |
| 9946374  | 350.16 | 5.92 | 5.8262  |
| 9966603  | 314.18 | 5.17 | 5.20878 |
| 74828378 | 550.51 | 6.05 | 5.80186 |
| 10115549 | 461.40 | 6.77 | 6.71997 |
| 25107622 | 416.89 | 5.72 | 6.01125 |
| 10143631 | 541.46 | 5.92 | 5.8715  |
| 44560681 | 554.65 | 5.00 | 5.08658 |
| 74932521 | 387.42 | 5.20 | 5.48482 |
| 43314375 | 293.76 | 5.34 | 5.41002 |
| 10132572 | 350.16 | 5.88 | 5.72317 |
| 44143413 | 434.79 | 7.64 | 7.64528 |
| 44563240 | 289.80 | 5.61 | 5.71957 |
| 23151331 | 381.45 | 5.00 | 5.00617 |
| 9817349  | 286.34 | 5.70 | 5.57962 |

|          |        |      |         |
|----------|--------|------|---------|
| 9979961  | 427.49 | 4.72 | 5.11308 |
| 74347296 | 350.50 | 4.96 | 4.67631 |
| 74828379 | 586.49 | 5.60 | 5.51392 |
| 57896613 | 573.51 | 6.00 | 5.9068  |
| 15986914 | 435.57 | 4.50 | 4.50298 |
| 15986644 | 467.99 | 4.50 | 4.57376 |
| 56667460 | 383.55 | 7.96 | 7.85846 |
| 56664290 | 350.46 | 6.12 | 6.36103 |
| 45272411 | 388.47 | 5.00 | 4.9214  |
| 45270870 | 445.57 | 5.32 | 5.34592 |
| 45272437 | 346.47 | 4.20 | 4.18525 |
| 56660415 | 550.18 | 5.89 | 6.00692 |
| 45271510 | 321.85 | 5.80 | 5.76712 |
| 75107798 | 423.98 | 7.20 | 7.1667  |
| 45272414 | 389.42 | 5.20 | 5.36004 |
| 45272426 | 321.85 | 5.50 | 5.30464 |
| 56674400 | 318.48 | 5.64 | 5.43581 |
| 56663998 | 442.62 | 5.70 | 5.76462 |
| 45271760 | 399.93 | 5.80 | 5.95162 |
| 45270796 | 355.44 | 5.37 | 5.20192 |
| 45273266 | 359.83 | 5.50 | 5.68622 |
| 56678014 | 318.48 | 5.12 | 5.14124 |
| 56677672 | 344.47 | 5.11 | 5.17213 |
| 56667448 | 525.73 | 5.02 | 4.98928 |

|          |        |      |         |
|----------|--------|------|---------|
| 24749507 | 421.54 | 4.20 | 4.2185  |
| 45269119 | 358.44 | 5.16 | 5.11396 |
| 56674421 | 462.62 | 5.02 | 5.20611 |
| 44517726 | 341.84 | 5.50 | 5.52466 |
| 56664310 | 442.62 | 5.93 | 5.99458 |
| 56670771 | 427.95 | 4.82 | 4.96964 |
| 45269118 | 402.49 | 6.04 | 6.10706 |
| 56671428 | 393.93 | 4.80 | 5.01396 |
| 45268438 | 295.81 | 5.50 | 5.67065 |
| 45273293 | 359.45 | 4.80 | 4.74768 |
| 45268127 | 322.41 | 4.50 | 4.61095 |
| 45272425 | 403.45 | 5.90 | 5.7781  |
| 75107919 | 375.94 | 5.90 | 5.82211 |
| 45487513 | 351.49 | 5.20 | 5.1713  |
| 45482705 | 394.54 | 4.71 | 5.00792 |
| 45482753 | 436.57 | 5.07 | 5.21205 |
| 45482728 | 395.52 | 3.72 | 3.67683 |
| 44627023 | 451.63 | 6.00 | 5.85775 |
| 44627357 | 481.51 | 6.20 | 6.21426 |
| 44626639 | 534.52 | 6.30 | 6.24275 |
| 24743758 | 481.51 | 6.00 | 6.04577 |
| 44626632 | 455.62 | 5.30 | 5.21521 |
| 67365726 | 460.52 | 5.40 | 5.43525 |
| 44627025 | 474.42 | 6.10 | 5.88607 |

|          |        |      |         |
|----------|--------|------|---------|
| 75228257 | 348.45 | 4.65 | 4.55745 |
| 25156194 | 331.46 | 4.58 | 4.53645 |
| 75228342 | 335.45 | 4.40 | 4.59841 |
| 75228283 | 317.43 | 4.55 | 4.39735 |
| 87964253 | 351.87 | 5.44 | 5.30039 |
| 11696460 | 374.48 | 5.44 | 5.37828 |
| 75228322 | 320.44 | 4.75 | 4.72143 |
| 44216386 | 317.43 | 4.92 | 5.05816 |
| 25156476 | 306.41 | 4.40 | 4.58052 |
| 21973860 | 399.58 | 5.55 | 5.57465 |
| 85120740 | 325.47 | 4.60 | 4.68405 |
| 75228298 | 254.37 | 3.66 | 3.93772 |
| 21973907 | 404.53 | 5.55 | 5.58615 |
| 46890443 | 350.38 | 4.98 | 4.99121 |
| 25156477 | 386.29 | 6.06 | 6.1505  |
| 46884462 | 389.90 | 5.18 | 5.11194 |
| 46883917 | 453.94 | 4.92 | 4.99324 |
| 46888778 | 555.88 | 5.80 | 5.83017 |
| 46888749 | 541.85 | 5.28 | 5.2949  |
| 46888750 | 555.88 | 5.06 | 5.09984 |
| 46888366 | 577.89 | 5.34 | 5.24972 |
| 46888748 | 555.88 | 5.92 | 5.89687 |
| 46888776 | 527.83 | 6.42 | 6.86846 |
| 52940753 | 477.55 | 6.70 | 6.56416 |



|          |        |      |         |
|----------|--------|------|---------|
| 52949300 | 521.66 | 6.20 | 6.27734 |
| 24758715 | 488.44 | 6.10 | 5.98916 |
| 24758947 | 474.08 | 5.60 | 5.62849 |
| 52946432 | 427.54 | 5.60 | 5.6365  |
| 68913061 | 364.43 | 4.90 | 5.14048 |
| 25072568 | 446.43 | 4.30 | 4.21692 |
| 25072244 | 450.39 | 4.80 | 4.86703 |
| 25022356 | 348.40 | 6.00 | 6.03697 |
| 73023748 | 359.49 | 4.50 | 4.39501 |
| 71851    | 265.44 | 5.23 | 5.21398 |
| 11502008 | 390.48 | 8.09 | 8.13052 |
| 72968146 | 523.69 | 5.30 | 5.34771 |
| 75953517 | 509.04 | 7.18 | 7.02696 |
| 76144979 | 473.01 | 5.08 | 5.00732 |
| 25151793 | 545.60 | 5.62 | 5.61326 |
| 25151988 | 491.63 | 4.95 | 4.93857 |
| 25153077 | 582.62 | 5.92 | 5.80298 |
| 74072623 | 508.62 | 5.89 | 5.78928 |
| 76152437 | 499.57 | 5.12 | 5.11127 |
| 76152796 | 500.56 | 5.05 | 4.97919 |
| 25125138 | 503.20 | 7.00 | 7.14261 |
| 56659871 | 427.46 | 5.09 | 5.10295 |
| 56659872 | 401.49 | 5.67 | 5.6014  |
| 73687875 | 391.51 | 5.13 | 5.27337 |

|          |        |      |         |
|----------|--------|------|---------|
| 56666240 | 306.41 | 5.08 | 4.98254 |
| 56673157 | 322.47 | 5.32 | 5.25201 |
| 56673090 | 377.91 | 5.70 | 5.92166 |
| 56659225 | 419.49 | 5.00 | 5.09482 |
| 56664483 | 442.62 | 5.72 | 5.63648 |
| 56670257 | 349.52 | 5.09 | 5.13516 |
| 56683751 | 295.42 | 6.38 | 6.35939 |
| 46241829 | 476.50 | 4.46 | 4.46074 |
| 46947816 | 476.50 | 5.00 | 5.02799 |
| 56675301 | 439.48 | 5.35 | 5.3683  |
| 54755801 | 559.59 | 5.12 | 4.91045 |
| 76391939 | 326.40 | 5.60 | 5.77562 |
| 54756045 | 510.51 | 4.70 | 4.65943 |
| 56678506 | 545.57 | 4.60 | 4.53375 |
| 56657930 | 528.62 | 4.92 | 4.77154 |
| 56671794 | 516.56 | 4.92 | 5.02074 |
| 56683044 | 521.56 | 4.51 | 4.48521 |
| 56676480 | 298.35 | 5.80 | 5.80474 |
| 76389284 | 326.40 | 5.60 | 5.51485 |
| 11660134 | 340.43 | 5.20 | 5.2511  |
| 76391512 | 342.40 | 5.40 | 5.55273 |
| 76393702 | 342.40 | 5.10 | 5.16509 |
| 76392272 | 328.37 | 5.40 | 5.56027 |
| 76392996 | 376.41 | 5.50 | 5.36633 |

|          |        |      |         |
|----------|--------|------|---------|
| 10324551 | 452.53 | 5.30 | 5.27612 |
| 53372672 | 381.48 | 4.50 | 4.40117 |
| 57663666 | 439.49 | 4.70 | 4.59266 |
| 57663581 | 438.50 | 4.20 | 4.13996 |
| 24782303 | 441.48 | 5.10 | 4.956   |
| 76586948 | 435.50 | 5.20 | 5.36196 |
| 57663596 | 439.49 | 4.20 | 4.17932 |
| 57663447 | 425.57 | 4.60 | 4.45917 |
| 24785870 | 397.52 | 4.60 | 4.49996 |
| 34598448 | 284.37 | 4.62 | 4.6932  |
| 60145493 | 312.43 | 4.87 | 4.78437 |
| 57803392 | 567.61 | 4.52 | 4.73187 |
| 57803351 | 595.67 | 5.00 | 5.01298 |
| 44332931 | 396.53 | 7.11 | 7.4415  |
| 78073551 | 369.85 | 5.90 | 5.93606 |
| 71449253 | 361.45 | 7.38 | 7.43143 |
| 71456366 | 364.45 | 7.66 | 7.64425 |
| 71451051 | 471.55 | 6.82 | 6.77844 |
| 71461788 | 357.43 | 7.64 | 7.54793 |
| 66615614 | 503.05 | 4.50 | 4.34836 |
| 46241611 | 506.52 | 4.76 | 4.88239 |
| 46241717 | 520.55 | 4.84 | 4.74666 |
| 46240584 | 532.58 | 5.21 | 5.20833 |
| 91248210 | 508.37 | 5.70 | 5.65369 |

|          |        |      |         |
|----------|--------|------|---------|
| 78074841 | 453.36 | 5.60 | 5.81296 |
| 91282137 | 568.46 | 5.20 | 5.00993 |
| 68003782 | 506.54 | 4.55 | 4.82457 |
| 68004010 | 548.62 | 4.43 | 4.17992 |
| 68004011 | 530.55 | 4.54 | 4.62682 |
| 71552097 | 499.54 | 4.34 | 4.3756  |
| 71552261 | 573.55 | 4.44 | 4.27011 |
| 71604552 | 362.49 | 6.68 | 6.7864  |
| 71604556 | 431.37 | 7.85 | 7.91257 |
| 12429371 | 287.40 | 5.79 | 5.7969  |
| 71605712 | 334.44 | 7.28 | 7.21609 |
| 71606402 | 438.59 | 4.84 | 5.01792 |
| 71606877 | 330.49 | 7.62 | 7.7013  |
| 71606712 | 310.50 | 5.70 | 5.74148 |
| 71604701 | 318.56 | 7.82 | 7.89128 |
| 57609886 | 294.38 | 6.26 | 6.31141 |
| 71606230 | 306.47 | 5.36 | 5.40329 |
| 71606232 | 446.57 | 6.53 | 6.32159 |
| 72375832 | 500.48 | 5.29 | 5.22211 |
| 72375835 | 500.48 | 5.16 | 4.92679 |
| 69087562 | 466.92 | 4.77 | 5.06387 |
| 69087440 | 446.51 | 5.00 | 4.95953 |
| 57331240 | 421.46 | 6.80 | 6.74451 |
| 72375747 | 418.50 | 5.60 | 5.5517  |

|          |        |      |         |
|----------|--------|------|---------|
| 72793448 | 335.49 | 5.32 | 5.31509 |
| 72793446 | 293.83 | 5.13 | 5.36984 |
| 72793578 | 279.85 | 5.73 | 5.63731 |
| 72793579 | 321.93 | 6.62 | 6.62083 |
| 72793520 | 273.46 | 5.93 | 6.08342 |
| 12951762 | 275.48 | 6.30 | 6.24164 |
| 72793582 | 281.86 | 5.60 | 5.52463 |
| 72793583 | 323.95 | 6.91 | 7.23016 |
| 72793584 | 287.44 | 6.91 | 6.90003 |
| 72793304 | 291.86 | 5.39 | 5.23132 |
| 72793308 | 271.44 | 5.45 | 5.60649 |
| 72793309 | 263.81 | 5.58 | 5.66743 |
| 72793378 | 305.89 | 6.06 | 6.02772 |
| 72793380 | 285.47 | 5.29 | 5.3065  |
| 72793383 | 285.47 | 5.36 | 5.27448 |
| 72793384 | 277.83 | 5.22 | 5.17444 |
| 72793441 | 299.50 | 5.72 | 5.76216 |
| 72793442 | 273.80 | 5.00 | 4.92698 |
| 76335400 | 279.81 | 4.84 | 4.90303 |
| 76331825 | 321.89 | 5.61 | 5.28639 |
| 72793517 | 265.82 | 5.95 | 6.03021 |
| 45278564 | 486.44 | 5.77 | 5.88438 |
| 90667423 | 554.57 | 4.06 | 4.15687 |
| 90667586 | 544.53 | 6.41 | 6.23542 |

|           |        |      |         |
|-----------|--------|------|---------|
| 90667590  | 442.48 | 4.03 | 3.68281 |
| 90667600  | 486.54 | 4.09 | 3.97576 |
| 68154116  | 261.72 | 4.30 | 4.45644 |
| 118707596 | 260.29 | 4.68 | 4.52053 |
| 118707597 | 276.74 | 4.68 | 4.90961 |
| 118707602 | 276.74 | 4.22 | 4.64974 |
| 118707603 | 262.71 | 4.70 | 4.68584 |
| 118710536 | 533.56 | 4.02 | 4.21893 |
| 118735868 | 505.57 | 5.84 | 5.75266 |
| 118735870 | 553.63 | 5.81 | 5.89549 |
| 71152709  | 521.55 | 8.06 | 7.9086  |
| 118736035 | 555.62 | 7.91 | 7.9167  |
| 71153161  | 495.54 | 8.78 | 8.90763 |
| 118736044 | 505.57 | 8.38 | 8.41192 |
| 122179455 | 398.51 | 6.47 | 6.45422 |
| 122179465 | 509.54 | 5.37 | 5.54359 |
| 122179473 | 497.49 | 4.67 | 4.82304 |
| 122179478 | 539.57 | 5.11 | 5.10408 |
| 122179483 | 568.57 | 4.46 | 4.40054 |
| 122182831 | 422.46 | 4.66 | 4.76808 |
| 122182832 | 404.47 | 4.59 | 4.44669 |
| 122182834 | 404.47 | 5.66 | 5.51449 |
| 122182881 | 421.50 | 4.41 | 4.08793 |
| 71153095  | 527.98 | 5.24 | 5.16226 |

|           |        |      |         |
|-----------|--------|------|---------|
| 71181567  | 511.53 | 5.89 | 6.08263 |
| 71487141  | 533.60 | 6.30 | 6.20009 |
| 122186032 | 579.63 | 5.44 | 5.45785 |
| 71152895  | 507.56 | 6.10 | 6.07385 |
| 78023056  | 591.64 | 6.22 | 6.22459 |
| 71153418  | 564.61 | 4.61 | 4.62796 |
| 71153030  | 546.60 | 5.05 | 5.22064 |
| 71181641  | 558.61 | 5.26 | 5.11273 |
| 71153157  | 593.65 | 6.00 | 6.02449 |
| 71153063  | 593.65 | 6.40 | 6.49292 |
| 71152932  | 537.59 | 5.62 | 5.61338 |
| 71152803  | 551.62 | 5.62 | 5.64373 |
| 122186271 | 567.62 | 4.98 | 5.11896 |
| 71153155  | 562.64 | 5.12 | 5.52571 |
| 71152823  | 548.62 | 5.43 | 5.5077  |
| 59472603  | 478.50 | 5.05 | 4.98599 |
| 59472511  | 468.56 | 5.80 | 5.90412 |
| 59472517  | 514.48 | 5.57 | 5.36098 |
| 122187730 | 510.64 | 5.05 | 4.93772 |
| 67516635  | 433.55 | 5.89 | 5.89694 |
| 71535563  | 359.81 | 4.58 | 4.88883 |
| 71152655  | 537.55 | 6.00 | 5.98817 |
| 127036551 | 566.59 | 4.74 | 4.66668 |
| 71181421  | 553.59 | 5.85 | 5.87816 |

|                             |        |      |         |
|-----------------------------|--------|------|---------|
| 90355676                    | 577.53 | 5.62 | 5.52548 |
| 71152955                    | 551.53 | 4.95 | 5.00448 |
| 127037414                   | 507.52 | 5.92 | 5.80981 |
| 71152850                    | 507.52 | 5.03 | 5.19601 |
| 127034022                   | 333.47 | 5.82 | 5.77278 |
| 11544795                    | 348.49 | 6.03 | 5.96014 |
| 127034292                   | 338.47 | 6.70 | 6.71479 |
| 11624970                    | 374.52 | 6.30 | 6.34479 |
| 127027566                   | 479.49 | 4.72 | 4.64692 |
| 69087452                    | 461.52 | 4.28 | 4.35812 |
| 127028816                   | 475.55 | 4.38 | 4.021   |
| 76747503<br>(chemspider ID) | 392.41 | 5.65 | 5.71026 |
| 134146922                   | 452.46 | 4.98 | 5.01787 |
| 118864337                   | 308.26 | 3.86 | 4.25411 |
| 137637204                   | 597.57 | 4.85 | 4.66486 |
| 121483470                   | 475.55 | 5.48 | 5.59467 |
| 25189510                    | 461.66 | 7.02 | 6.89245 |
| 137631897                   | 285.27 | 5.05 | 5.29046 |
| 130449717                   | 441.54 | 5.10 | 4.85564 |
| 121344565                   | 452.51 | 4.67 | 4.62713 |
| 118334979                   | 353.36 | 5.70 | 5.61052 |
| 78041485                    | 571.53 | 5.35 | 5.37517 |
| 137651081                   | 446.50 | 5.75 | 5.69691 |
| 137645234                   | 321.25 | 4.82 | 4.89236 |



|           |        |      |         |
|-----------|--------|------|---------|
| 121314002 | 438.53 | 5.35 | 5.15678 |
| 65459349  | 285.27 | 5.75 | 5.87709 |
| 137647028 | 457.40 | 5.00 | 5.20633 |
| 137647807 | 544.64 | 4.85 | 4.75863 |
| 25190134  | 404.57 | 5.78 | 5.86871 |
| 67264950  | 337.42 | 4.66 | 4.67486 |
| 137643261 | 437.54 | 5.48 | 5.40011 |
| 71223050  | 569.54 | 5.24 | 5.13787 |

**Table S2.** PubChem CID, molecular weights, experimental pIC<sub>50</sub> values, and calculated pIC<sub>50</sub> values of all the molecules in test sets.

| PubChem CID | molecular weight | experimental<br>pIC <sub>50</sub> | calculated<br>pIC <sub>50</sub> |
|-------------|------------------|-----------------------------------|---------------------------------|
| 3100        | 255.36           | 4.50                              | 6.22323                         |
| 44417919    | 433.98           | 5.58                              | 9.17927                         |
| 11973800    | 398.41           | 7.67                              | 3.72536                         |
| 11569300    | 485.33           | 8.60                              | 7.35554                         |
| 44418497    | 347.46           | 3.93                              | 4.00808                         |
| 11663999    | 551.75           | 5.90                              | 7.01757                         |
| 23630796    | 524.68           | 6.10                              | 8.58192                         |
| 11692293    | 534.63           | 4.18                              | 5.73231                         |
| 44442481    | 386.42           | 5.58                              | 8.19453                         |
| 11649549    | 539.62           | 4.38                              | 9.36729                         |
| 85051858    | 542.56           | 5.75                              | 6.47375                         |
| 11569996    | 525.71           | 6.00                              | 6.057                           |

|          |        |      |         |
|----------|--------|------|---------|
| 11613873 | 566.64 | 5.60 | 5.62079 |
| 11548755 | 580.67 | 6.60 | 7.14462 |
| 11497680 | 552.61 | 5.70 | 9.53744 |
| 44418473 | 271.36 | 4.28 | 7.47262 |
| 15987451 | 443.49 | 5.10 | 7.62239 |
| 44442488 | 398.48 | 5.00 | 7.52042 |
| 44417895 | 513.65 | 5.30 | 6.17241 |
| 74983959 | 414.54 | 5.36 | 8.7677  |
| 9835490  | 283.70 | 5.08 | 5.87855 |
| 15979148 | 577.69 | 5.56 | 8.42995 |
| 44563206 | 310.22 | 5.94 | 5.53712 |
| 44589077 | 400.27 | 4.50 | 5.96448 |
| 24948948 | 381.45 | 5.22 | 4.31727 |
| 43314210 | 259.32 | 4.70 | 4.94574 |
| 9965169  | 265.71 | 5.13 | 6.0354  |
| 44562989 | 282.16 | 5.41 | 3.34054 |
| 25107759 | 489.45 | 6.14 | 4.69235 |
| 9879772  | 312.19 | 6.16 | 2.8279  |
| 44563204 | 315.72 | 5.29 | 7.68583 |
| 44563203 | 326.22 | 6.11 | 4.21917 |
| 56670908 | 599.73 | 5.13 | 8.80686 |
| 56677638 | 560.17 | 5.68 | 5.64702 |
| 56677612 | 296.37 | 5.04 | 4.76573 |
| 75108057 | 309.79 | 5.30 | 2.45035 |

|          |        |      |         |
|----------|--------|------|---------|
| 56670755 | 338.45 | 5.97 | 7.99489 |
| 45270903 | 347.88 | 6.40 | 8.10107 |
| 45271511 | 357.37 | 4.80 | 4.78173 |
| 72976566 | 473.56 | 6.10 | 9.3539  |
| 85146495 | 345.49 | 4.70 | 1.45229 |
| 18452955 | 377.51 | 5.55 | 6.2589  |
| 85134103 | 351.51 | 4.69 | 9.71113 |
| 85120052 | 280.41 | 4.36 | 6.793   |
| 21973904 | 433.50 | 5.55 | 7.80069 |
| 21973886 | 399.55 | 5.87 | 6.11901 |
| 46888688 | 573.82 | 6.22 | 4.89441 |
| 69255825 | 479.65 | 5.20 | 2.56501 |
| 69256095 | 513.67 | 5.89 | 4.87403 |
| 53317307 | 440.54 | 9.17 | 7.54452 |
| 11596311 | 392.50 | 8.01 | 0.95638 |
| 75596930 | 517.65 | 8.00 | 9.08813 |
| 76153126 | 512.61 | 4.77 | 5.08317 |
| 73687874 | 411.50 | 5.83 | 2.71404 |
| 56673158 | 322.47 | 5.61 | 3.98728 |
| 46946452 | 498.55 | 5.62 | 0.48518 |
| 56664979 | 529.56 | 6.08 | 7.23569 |
| 56666237 | 340.43 | 5.60 | 5.03763 |
| 24785864 | 441.48 | 5.10 | 4.18679 |
| 24785333 | 455.49 | 4.80 | 7.97115 |

|           |        |      |         |
|-----------|--------|------|---------|
| 70685675  | 298.40 | 4.03 | 6.10449 |
| 78070900  | 368.86 | 5.90 | 5.10301 |
| 78072941  | 410.94 | 8.40 | 8.00826 |
| 56970864  | 431.53 | 6.33 | 8.87946 |
| 68154164  | 259.30 | 4.49 | 6.51082 |
| 69274365  | 477.42 | 4.50 | 9.14253 |
| 46240482  | 482.52 | 4.50 | 5.66272 |
| 91410354  | 597.51 | 6.00 | 5.24899 |
| 71720519  | 283.41 | 8.29 | 2.71066 |
| 71606398  | 363.26 | 5.41 | 6.21416 |
| 69087495  | 446.51 | 4.70 | 9.11345 |
| 58576126  | 273.46 | 7.24 | 5.54435 |
| 72793514  | 293.88 | 6.61 | 3.60455 |
| 118707606 | 261.27 | 4.39 | 6.34382 |
| 71152722  | 488.52 | 8.41 | 7.60934 |
| 118736041 | 493.54 | 8.60 | 7.37656 |
| 71152755  | 506.58 | 8.92 | 5.76261 |
| 118736776 | 462.52 | 7.19 | 8.25625 |
| 122179469 | 541.60 | 5.80 | 6.39264 |
| 122179482 | 569.55 | 4.52 | 6.85394 |
| 71153175  | 579.63 | 4.36 | 3.68681 |
| 78015474  | 577.61 | 4.40 | 4.58702 |
| 71152975  | 565.64 | 6.16 | 9.0444  |
| 71152643  | 550.63 | 5.10 | 8.02864 |

|           |        |      |         |
|-----------|--------|------|---------|
| 71536660  | 386.88 | 4.91 | 5.84627 |
| 71152656  | 523.56 | 5.21 | 7.46987 |
| 89315867  | 522.53 | 5.27 | 5.11206 |
| 86730519  | 447.49 | 5.19 | 8.77993 |
| 118864285 | 338.74 | 5.09 | 7.11262 |
| 56603301  | 474.48 | 5.11 | 8.27373 |
| 89464128  | 336.35 | 4.40 | 6.51214 |
| 25190431  | 461.66 | 6.60 | 5.79501 |
| 137631834 | 315.29 | 5.43 | 7.24104 |
| 137656215 | 378.39 | 4.88 | 4.60133 |
| 56603116  | 472.51 | 5.27 | 8.4761  |
